# Supplementary material for: Plasma osteopontin versus intima media thickness of the common carotid arteries in well-characterised patients with systemic lupus erythematosus
Source: PubMed Central journal article supplement (PMC8209759; doi:10.1177/09612033211013898), 2021-05-06

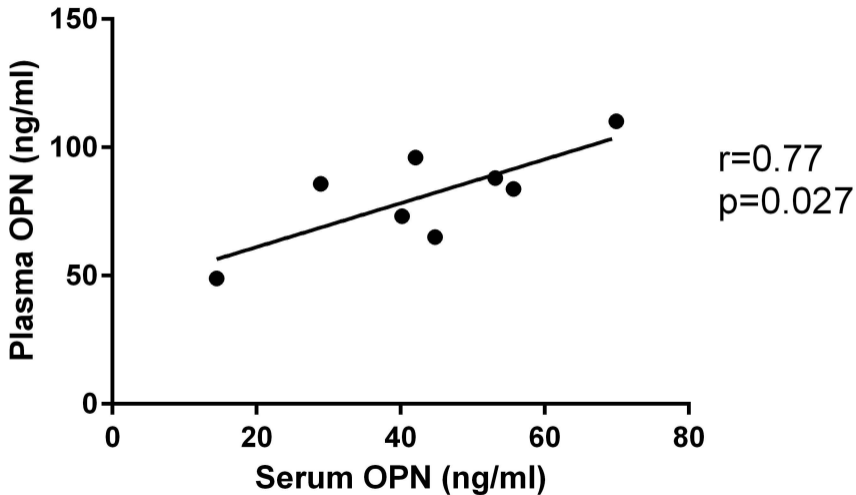

Supplement: sj-pdf-1-lup-10.1177_09612033211013898.pdf [file sj-pdf-1-lup-10.1177_09612033211013898.pdf]
